# Supplementary figures and images for: Estimation of Genetic Diversity and Number of Unique Genotypes of Cassava Germplasm from Burkina Faso Using Microsatellite Markers
Source: MDPI journal article supplement (doi:10.3390/genes15010073), 2024-01-05

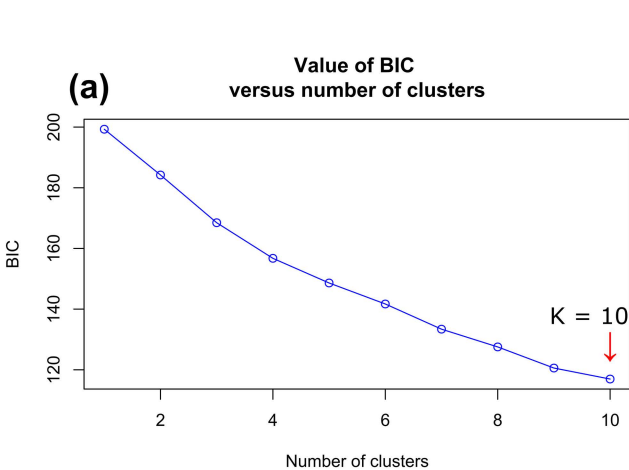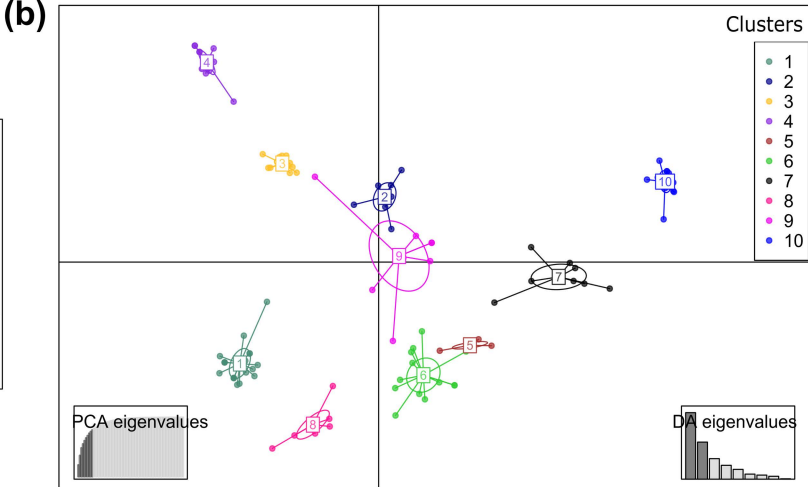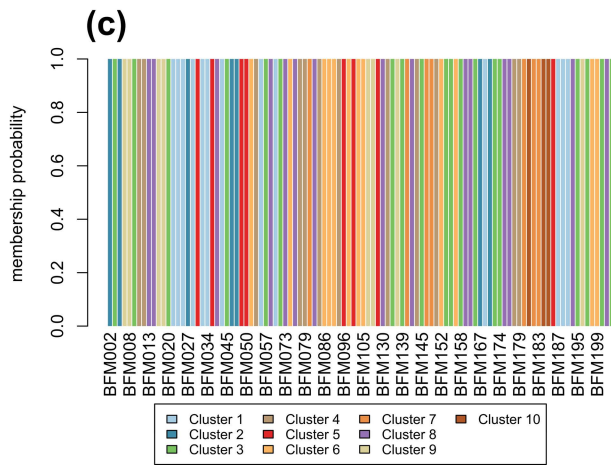

Supplement: s1 [file s1]

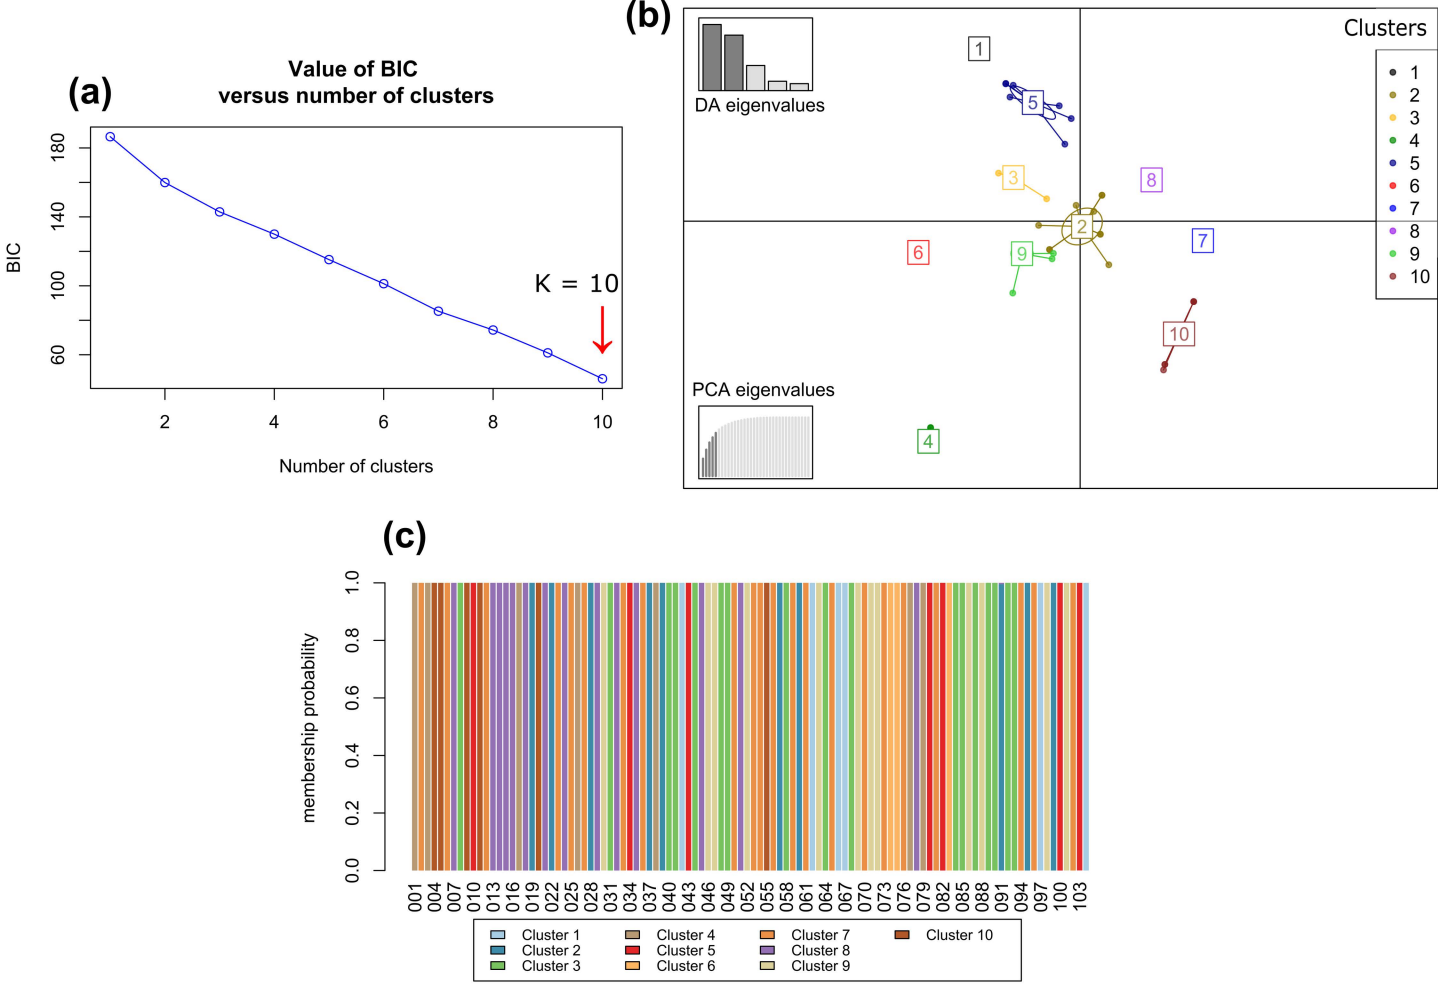

Supplement: s1 [file s1]
